# Supplementary material
Source: PubMed Central journal article supplement (PMC3256587)
Supplement: NIHMS279584-supplement-Supp_Fig__legend.pdf [file NIHMS279584-supplement-Supp_Fig__legend.pdf]

**Supplemental figure 1. DAP12 required for degranulation defect seen in tolerant**

**NK cells.** (A) Representative dot plots demonstrating CD107a (LAMP-1) expression by freshly isolated splenocytes from WT, m157-Tg, DAP12ki or m157-TgDAP12ki mice stimulated with YAC cell targets. The numbers represent the percentage of Ly49H<sup>+</sup> or Ly49H<sup>-</sup> NK cells expressing CD107a. The dot plots were gated on NK cells (NK1.1<sup>+</sup>, CD3<sup>-</sup> lymphocytes). (B) The ratio of the percentage CD107a expressing Ly49H<sup>+</sup> NK cells to the percentage of CD107a expressing Ly49H<sup>-</sup> NK cells in non-Tg and m157-Tg mice in the C57BL/6 and DAP12ki. The graph represents the mean  $\pm$  the SEM. Ratios were calculated after stimulation with YAC target cells. The number of mice used in each group: WT=11, m157Tg=10, DAP12ki=6 and m157TgDAP12ki=6.

**Supplemental figure 2. Assessment of donor NK cells 6 hours post transfer of WT**

**splenocytes into WT or m157Tg mice.** (A) Representative dot plots demonstrating IFN- $\gamma$  production by freshly isolated donor splenocytes stimulated with PBS or plate bound anti-NK1.1 mAb at 6 hours post transfer. The numbers represent the percentage of Ly49H<sup>+</sup> or Ly49H<sup>-</sup> NK cells producing IFN- $\gamma$ . The dot plots were gated on donor NK cells (NK1.1<sup>+</sup>, CD3<sup>-</sup>, CFSE<sup>+</sup> cells). (B) The ratio of the percentage of IFN- $\gamma$  producing Ly49H<sup>+</sup> NK cells to the percentage of IFN- $\gamma$  producing Ly49H<sup>-</sup> NK cells from WT $\rightarrow$  WT (n=4) or WT $\rightarrow$  m157-Tg (n=6) mice following stimulation with plate bound anti-NK1.1 mAb. The results are presented as the mean  $\pm$  SEM. (C) Assessment of NK cell activation markers (CD69) and maturation marker (Mac1) on cell surface of donor NK cells at 6 hours post transfer.

**Supplemental figure 3. Assessment of donor NK cells 24 hours post transfer of WT**

**splenocytes into WT or m157Tg mice.** (A) Representative dot plots demonstrating IFN-

$\gamma$  production by freshly isolated donor splenocytes stimulated with PBS or plate bound anti-NK1.1 mAb at 24 hours post transfer. The numbers represent the percentage of Ly49H<sup>+</sup> or Ly49H<sup>-</sup> NK cells producing IFN- $\gamma$ . The dot plots were gated on donor NK cells (NK1.1<sup>+</sup>, CD3<sup>-</sup>, CFSE<sup>+</sup> cells). (B) The ratio of the percentage of IFN- $\gamma$  producing Ly49H<sup>+</sup> NK cells to the percentage of IFN- $\gamma$  producing Ly49H<sup>-</sup> NK cells from WT $\rightarrow$  WT (n=6) or WT $\rightarrow$  m157-Tg (n=8) mice following stimulation with plate bound anti-NK1.1 mAb. The results are presented as the mean  $\pm$  SEM. (C) Assessment of NK cell activation markers (CD69) and maturation marker (Mac1) on cell surface of donor NK cells at 6 hours post transfer.

**Supplemental figure 4. Kinetics of the reversal of tolerance upon transfer of m157-Tg NK cells into WT mice.** (A) Representative dot plots demonstrating IFN- $\gamma$  production by freshly isolated donor splenocytes stimulated with plate bound anti-NK1.1 mAb at 24 and 72 hours post transfer. The dot plots were gated on donor NK cells (NK1.1<sup>+</sup>, CD3<sup>-</sup>, CFSE<sup>+</sup> cells). The numbers represent the percentage of Ly49H<sup>+</sup> or Ly49H<sup>-</sup> NK cells producing IFN- $\gamma$ . The dot plots were gated on donor NK cells (NK1.1<sup>+</sup>, CD3<sup>-</sup>, CFSE<sup>+</sup> cells). (B) The ratio of the percentage of IFN- $\gamma$  producing Ly49H<sup>+</sup> NK cells to the percentage of IFN- $\gamma$  producing Ly49H<sup>-</sup> NK cells from m157-Tg $\rightarrow$  WT (n=6 at 24 hr and n=5 at 72 hr) or m157-Tg $\rightarrow$  m157-Tg (n=3 at both 24 and 72 hr) mice following stimulation with plate bound anti-NK1.1 mAb at either 24 or 72 hours post transfer. The results are presented as the mean  $\pm$  SEM.
